# Supplementary material
Source: publisher figshare collection journal article supplement (https://diabetesjournals.figshare.com/ndownloader/files/39170678)
Supplement: Supplementary file 1 [file 39170678]

**Supplementary file 1: Residential relocation and changes in drivability quintile of study participants over follow-up**

| **Changes in residential drivability quintile** | **% of population** |
| --- | --- |
| Did not move | 49.8% |
| Moved within Toronto, same drivability quintile | 10.5% |
| Moved within Toronto, within 1 quintile change | 11.6% |
| Moved within Toronto, >1 quintile change | 8.0% |
| Moved outside of study area (drivability quintile unknown) | 20.1% |

**Supplementary file 2: model for association drivability and diabetes, with a random intercept at the DA level.**

| **Drivability quintiles** | **HR Model 1** | **Lower 95%CI** | **Upper 95%CI** | **HR Model 1 with random intercept** | **Lower 95%CI** | **Upper 95%CI** | |
| --- | --- | --- | --- | --- | --- | --- | --- |
| **Q1 (low)** | **1** |  |  | **1** |  |  | |
| **Q2** | 1·14 | 1·11 | 1·17 | 1·08 | 1·02 | 1·13 | |
| **Q3** | 1·46 | 1·42 | 1·50 | 1·41 | 1·34 | 1·48 | |
| **Q4** | 1·57 | 1·53 | 1·60 | 1·52 | 1·44 | 1·60 | |
| **Q5 (high)** | 1·57 | 1·54 | 1·61 | 1·55 | 1·47 | 1·63 | |
| Model 1: age and sex  Variance Partition Coefficient (VPC): 0·05 | | | | | | |

**Supplementary file 3: Effect modification by sex, age, immigration status, and neighbourhood income, for the association between drivability and diabetes risk**

Analyses adjusted for age, sex, income, ethnicity, immigration status, comorbidities.

Supplementary file 4: Hazard ratios for risk of developing diabetes in highest relative to lowest neighborhood drivability quintile (Q), by age and area income, excluding participants that moved out of Toronto during follow-up (n=291,677).

**Supplementary file 5: the associations between drivability index quintile and diabetes risk, stratified by income (within graph) and by age (panels)**

**Supplementary file 6: Sensitivity analyses using the specific algorithm to define diabetes, in the associations between drivability index quintile and diabetes risk, stratified by income (within graph) and by age (panels)**

Analyses fully adjusted: for sex, ethnicity, immigration status and comorbidities.

**Supplementary file 7: Additive interaction of walkability and drivability with diabetes risk**

**Supplementary file 8: Map of the City of Toronto illustrating the neighbourhood categories of drivability and walkability**

**
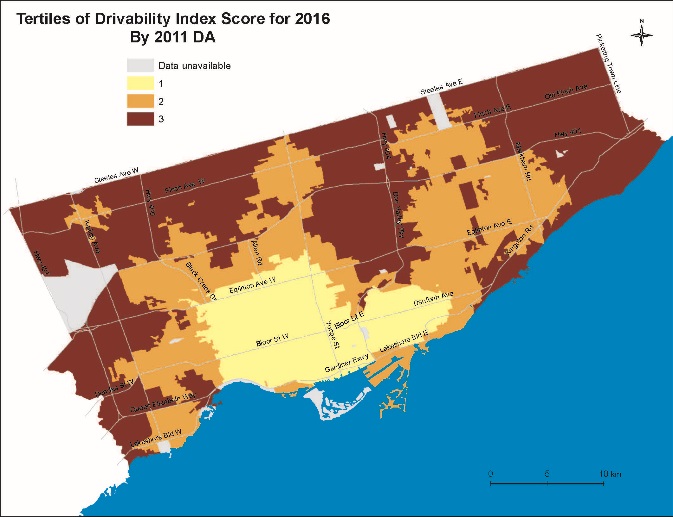

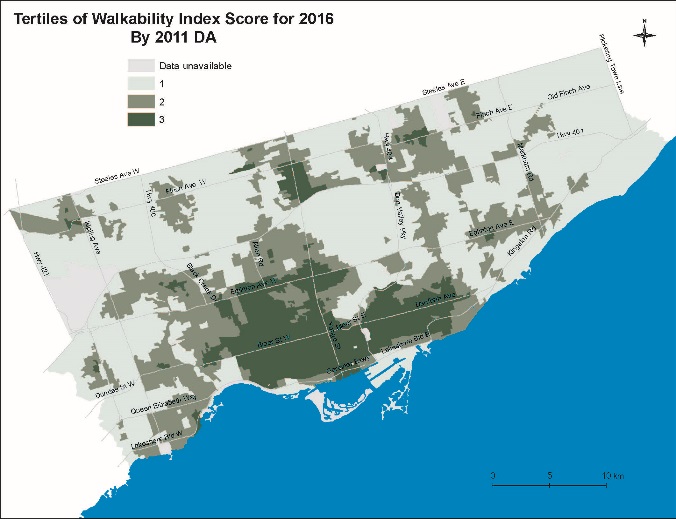
**
